1 **Four QTL underlie resistance to a microsporidian parasite that may drive genome evolution in its**  
2 ***Daphnia* host**

3 Devon Keller<sup>1</sup>, Devin Kirk<sup>1,2</sup>, Pepijn Luijckx<sup>1,3</sup>

4 <sup>1</sup> Department of Ecology and Evolutionary Biology, University of Toronto, Toronto, Ontario, Canada,  
5 M5S 3G5.

6 <sup>2</sup> Current address: Department of Biology, Stanford University, Stanford, USA.

7 <sup>3</sup> School of Natural Sciences, Zoology, Trinity College Dublin, Dublin 2, Ireland

8 **Author contributions**

9 DK, DK and PL designed the study and conducted experiments. PL conducted the analysis. PL wrote the  
10 first draft of the manuscript, and all authors significantly contributed to revisions.

11 **Abstract:**

12 Despite its pivotal role in evolutionary and ecological processes the genetic architecture underlying host-  
13 parasite interactions remains understudied. Here we use a quantitative trait loci approach to identify  
14 regions in the *Daphnia magna* genome that provide resistance against its microsporidium parasite  
15 *Ordospora colligata*. The probability that *Daphnia* became infected was affected by a single locus and an  
16 interaction between two additional loci. A fourth locus influenced the number of spores that grew within  
17 the host. Comparing our findings to previously published genetic work on *Daphnia magna* revealed that  
18 two of these loci may be the same as detected for another microsporidium parasite, suggesting a general  
19 immune response to this group of pathogens. More importantly, this comparison revealed that two regions  
20 previously identified to be under selection coincided with parasite resistance loci, highlighting the pivotal  
21 role parasites may play in shaping the host genome.

22 **Keywords:** trade off, resistance, burden, selection, *Daphnia*, microsporidium, negative frequency  
23 dependent selection.

24

25

26

## 27 **Introduction**

28 Infectious diseases can cause substantial mortality in host populations and thereby affect ecological and  
29 evolutionary processes. For example, by increasing mortality of a superior competitor parasites may  
30 facilitate species coexistence (Hatcher et al. 2006) or aid invasive species by parasite spill over (Strauss et  
31 al. 2012 and references therein). Parasites can also be important selective agents that can shape the  
32 genetic structure of host populations (Betts et al. 2018). Indeed, a trematode parasite of New Zealand  
33 freshwater snails has been shown to alter the genotype frequencies in its host population by preferentially  
34 infecting and reducing fecundity in common snail genotypes (Dybdahl and Lively 1998). The observation  
35 that host resistance genes (i.e. genes that prevent or impede parasite establishment or growth within the  
36 host) are highly diverse and rapidly evolving further highlights the role parasites have in shaping the  
37 genetic architecture of their host (Hammond-Kosack and Jones 1997; Bonneaud et al. 2011; Zhang et al.  
38 2019). However, although ecological and evolutionary theory regularly make assumptions regarding the  
39 genetic architecture of parasite resistance, in many cases the actual genetic architecture remains unknown  
40 (Ebert 2018). How many genes underlie parasite resistance? How do they interact? And how are they  
41 organized in the genome? Addressing these questions is key if we are to better understand the complex  
42 ecological and evolutionary processes that parasites are involved in.

43 Evolutionary and ecological theories have assumed a wide range of genetic models to describe the genetic  
44 architecture of host resistance (e.g. Gene For Gene (Thompson and Burdon 1992) and Matching Allele  
45 Models (Luijckx et al. 2013) which has led to diverse and sometimes contrasting predictions. For  
46 example, under the assumption of quantitative resistance there may be no effect of varying levels of  
47 resistance on the occurrence of disease outbreaks (Springbett et al. 2003), while a qualitative genetic  
48 assumption suggests large effects (King and Lively 2012). Similarly, genetic architecture plays a key role  
49 in the evolutionary debate as to why there is considerable genetic variation for disease-related traits in  
50 natural populations despite evolutionary forces that continuously reduce genetic variation (i.e. drift and  
51 directional selection). For instance, in models where selection pressure imposed by the parasite on the  
52 host follows negative frequency-dependent selection (NFDS, Red Queen models), genetic variation can  
53 be maintained indefinitely but only with specific assumptions regarding the genetic architecture (Otto and  
54 Nuismer 2004) which have rarely been demonstrated empirically (but see, Metzger et al. 2016). Under  
55 NFDS, pathogens adapt to the most common host genotype, which is subsequently outcompeted by a rare  
56 host genotype that is resistant to the prevailing pathogen. This continues until this host itself becomes  
57 common, and the cycles repeats. To lead to such cycles, the genetic architecture underlying host  
58 resistance needs to be based on a small number of loci (five or less (Otto and Nuismer, 2004). In addition,

59 hosts that are resistant to all pathogen genotypes and pathogens that are able to infect all hosts should be  
60 absent for NFDS to occur (Luijckx *et al.*, 2013).

61 A study on the water flea *Daphnia magna* and its microsporidian parasite *Ordospora colligata* (OC)  
62 revealed high levels of variation for host resistance and parasite infectivity (Refardt and Ebert 2007,  
63 Stanic *et al.* unpublished) Furthermore, with evidence for highly specialised parasite strains and absence  
64 of universally infective parasites (Refardt and Ebert 2007, Stanic *et al.* unpublished) and evidence for  
65 evolution in response to selection by *Ordospora* (Capual and Ebert 2003), this host-parasite system meets  
66 the prerequisites for coevolution by negative frequency-dependent selection. The nature of the genetic  
67 architecture underlying host specificity, however, remains unknown. Here we use quantitative trait loci  
68 (QTL) to identify regions in the host genome that are associated with variation in host resistance against  
69 one strain of *Ordospora*. We show that the genetic architecture underlying resistance to this strain is  
70 relatively simple, consistent with theory on coevolution by NFDS. Resistance to infection is determined  
71 by three QTL that explain 33% of the observed variation, and parasite burden within infected hosts is  
72 determined by one QTL which explains 18% of variation. Furthermore, a comparison with previous  
73 studies reveals that microsporidian parasites may exert substantial selection on *Daphnia* populations.

## 74 **Materials and Methods**

### 75 *Study system*

76 The water flea *D. magna* inhabits fresh water lakes and ponds across the northern hemisphere where it  
77 plays a key role in ecosystem functioning (e.g. by grazing down phytoplankton, influencing water  
78 transparency, and preventing the outbreak of algal blooms). Throughout its range it is infected by the  
79 microsporidian gut parasite *O. colligata* (Ebert 2005). This parasite shows local adaptation (Refardt and  
80 Ebert 2007, Stanic *et al.* unpublished) and can reach high prevalence (up to 100%) in natural populations  
81 (Ebert 2005). Furthermore, there is variation in resistance within populations, with some hosts within the  
82 same population being either fully resistant or susceptible (Refardt and Ebert 2007, Stanic *et al.*  
83 unpublished). Infection with *Ordospora* occurs when *Daphnia* inadvertently ingest environmental spores  
84 of the parasite while filter feeding. The parasite subsequently invades the epithelial gut cells where it  
85 reproduces intracellularly and eventually lyses the cells. After being released, the spores either infect  
86 neighbouring gut cells or are released with the faeces into the environment where they can infect new  
87 hosts.

88

89

## 90 *The QTL Panel*

91 The QTL panel used for this study has been previously utilized to identify loci in *D. magna* for other  
92 traits, including resistance to several different pathogens. We refer interested readers to Routtu et al  
93 (2010) and Routtu et al (2014) for details on the genetic map and the F2 panel. In short, since *D. magna*  
94 reproduce via facultative parthenogenesis, genetic crosses can be performed. These crosses result in  
95 recombinant offspring that can subsequently be maintained asexually in clonal populations. A standing  
96 panel of *D. magna* F2 lines, genotyped at 1324 SNP-markers, is maintained in the laboratory of Dieter  
97 Ebert (<http://evolution.unibas.ch/ebert/research/qtl/index.htm>). This panel was created by selfing a single  
98 hybrid F1 clone that was obtained by crossing two parental genotypes that are divergent for numerous life  
99 history traits, including parasite resistance. Samples for the parents were originally collected from  
100 Finland, Tvärminne (X-clone) and Germany, Munich (I-clone). These genotypes were selfed three times  
101 and once, respectively, to obtain the maternal (Xinb3, BB-genotype) and paternal (Iinb1, AA-genotype)  
102 genotypes. In total we used 186 different clonal F2 lines from the standing QTL panel to identify  
103 resistance loci in *D. magna* against *Ordospora* strain 2, which originated from Belgium.

## 104 *Phenotyping*

105 Prior to assessing resistance against *Ordospora*, the *Daphnia* QTL panel was maintained for 8 weeks  
106 under standard conditions to minimize maternal effects. Ten to twelve adult females were kept in 400 ml  
107 glass microcosms filled with Artificial *Daphnia* Medium (ADaM; Klüttgen et al. 1994, modified to use  
108 only 5% of the recommended SiO<sub>2</sub> concentration). Animals were transferred to clean microcosms  
109 containing fresh medium twice per week and fed three times per week with 125 million batch-cultured  
110 green algae (*Monoraphidium minutum*, SAG 278-3, Algae Collection University of Goettingen).  
111 Microcosms were kept in a biochamber with a 16:8 light:dark cycle, at 20°C. Phenotyping of *Ordospora*  
112 resistance was initiated by collecting six and twelve females juveniles (up to 48 hours old) respectively  
113 from each of the F2-lines and both parental lines. Animals were individually placed into separate 100 ml  
114 microcosms filled with 80 ml ADaM and 15 million algae. When juveniles were between 3 and 5 days  
115 old they were exposed to 50,000 spores of *Ordospora*. The spore solution was prepared by homogenizing  
116 a large quantity of infected hosts, and spore concentrations were quantified using a hemocytometer and  
117 phase contrast microscopy (400x magnification). Animals were exposed to the parasite for seven days,  
118 after which they were transferred to fresh medium. All individuals were fed a diet of 15 million algae  
119 three times per week throughout the experiment and were transferred to fresh medium twice per week.  
120 The experiment was terminated when animals were 30 days old, at which point all animals were  
121 sacrificed and dissected. Dissections and inspection under phase contrast microscopy allowed us to  
122 determine infection status (infected or not) as well as quantify the total number of parasite clusters

123 (parasite burden) within the host. Any individuals that died before the end of the experiment were  
124 dissected within 24 hours of death, and infection status was recorded.

### 125 *Analysis*

126 We measured two types of resistance: resistance to infection (infectivity) and resistance to within-host  
127 growth (parasite burden). Infectivity was scored as the proportion of replicates that became infected,  
128 excluding any individuals that died within 10 days from the start of the exposure as it is difficult to  
129 identify *Ordospora* in the early stages of infection. In addition, we excluded any F2 line that had fewer  
130 than three replicates (small sample size was caused by early deaths or undetermined infection status due  
131 to dissection failures). Burden was measured as the mean number of spore clusters per F2 line, only  
132 including infected replicates from the last day of the experiment (day 30) to avoid interpreting individuals  
133 that died early (where the parasite had less time to develop) as more resistant. Burden data was square  
134 root transformed to deal with deviations from normality. Analysis for both infectivity and burden were  
135 performed using R statistical software version 3.3.1 (R Development Core Team 2016) and QTL were  
136 identified using the R package R/qtl version 1.40-8 (Broman et al. 2003). To identify QTL, we performed  
137 single genome scans for both traits followed by two dimensional scans to detect epistatic interactions  
138 between QTL. Candidate QTL were joined into a single model, and their location was further refined by  
139 moving each QTL to the position with the highest likelihood. We used analysis of variance to estimate the  
140 proportion of total variance explained by the fitted models. Here, we report the results of the Haley-Knott  
141 regression method, which is robust to the use of proportion data. Although this method can be sensitive to  
142 epistasis and linkage, the extended Haley-Knott method (which addresses these shortcomings, Feenstra et  
143 al. 2006) gave near identical results for single genome scans (results not shown). Genome-wide  
144 significance levels for infectivity and burden were calculated using 10,000 permutation tests. For QTLs  
145 underlying infection, significant ( $\alpha < 0.05$ ) and suggested ( $\alpha < 0.10$ ) QTLs corresponded to LOD scores  
146 of 3.79 and 3.47, respectively, while for QTLs underlying spore burden these values corresponded to 3.82  
147 and 3.46.

### 148 *Comparison with previous studies*

149 To compare our findings to previous work we obtained the 95% confidence intervals of QTL identified  
150 for other pathogens in *D. magna* (Routtu and Ebert 2015; Krebs et al. 2017). As confidence intervals  
151 were not always available from the original publications, we reanalysed the original data sets (data kindly  
152 provided by D. Ebert) for all QTL with potential overlap with the QTL we identified for *Ordospora*. Two  
153 studies on *Hamiltosporidium tvaerminnensis* (formerly known as *Octosporia bayeri*, Haag et al. 2011)  
154 showed potential overlap with the QTL we identified. We reanalysed the QTL identified for

155 *Hamiltosporidium* for spore burden following both horizontal and vertical transmission, and the ability of  
156 the parasite to persist in the host population for over 30 weeks (Rouutu and Ebert 2015; Krebs et al. 2017).  
157 For both studies we used single dimensional scans to obtain the LOD profiles, calculated the 95%  
158 confidence intervals and fitted the genetic models specified in their respective publications if multiple  
159 QTL were identified on the same linkage group (i.e. chromosome). Finally, we checked if any of the QTL  
160 identified overlapped with areas in the *Daphnia* genome found to be under selection (Bourgeois et al.  
161 2017). As this study used a different version of the genome assembly than the previous studies (version  
162 2.4 vs version 2.3) we used BLAST to find the areas under selection and markers associated with the QTL  
163 in the newest *D. magna* assembly (Pacbio, Fields and Ebert, unpublished) to verify their positions.

## 164 **Results**

### 165 *Infectivity*

166 The maternal line (Xinb3) was more susceptible to *Ordospora* strain 2 (8 out of 10 replicates infected)  
167 than the paternal line (linb1, 5 out of 12 infected), although this difference was not significant ( $P = 0.099$   
168 fisher exact test). The F1 hybrid was more resistant than either of the parents with only one replicate out  
169 of twelve infected ( $P = 0.0023$ ). Out of the F2-lines, 30% ( $n=50$ ) were fully resistant to *Ordospora* strain  
170 2, while in the remaining 70% ( $n=114$ ) one or more replicates were infected, with only a few lines (4%,  
171  $n=6$ ) fully susceptible (Fig. 1A). A single-QTL genome scan revealed a QTL for infectivity (scored as the  
172 proportion of replicates infected) at the beginning of linkage group 1 with a LOD score of 4.9 explaining  
173 ~13% of the observed phenotypic variation (Table 1, Fig. 1B, Table S1). As expected from the parental  
174 genotype, individuals carrying alleles from the maternal line (BB or AB) were more susceptible than  
175 those that had the paternal genotype (AA, Fig. 2D). Variation explained increased to 17.5% when  
176 infectivity was considered a binary trait (i.e. a F2 line was considered susceptible when a single replicate  
177 was infected), but due to a lack of convergence in scans for interactions between two QTLs this approach  
178 was not further pursued. A two-QTL scan on the proportion of replicates infected did suggest ( $\alpha < 0.1$ )  
179 the presence of an additional pair of interacting QTL located on linkage group 7 and 8 explaining 23% of  
180 the observed phenotypic variation (Fig. 1B, table 1). Individuals carrying the maternal genotype on  
181 linkage group 7 (BB, AB) were more susceptible to *Ordospora*, but only if they carried alleles of the  
182 paternal genotype (AA, AB) on linkage group 8. Additionally, homozygous individuals (AA) were highly  
183 susceptible (~75% of replicates infected) on a BB background (Fig. 1F). A model combining the three  
184 QTL and the interaction captured 33% of the phenotypic variation in infectivity (Table 1).

185

186 *Parasite burden*

187 Although both parental lines were susceptible to *Ordospora* strain 2, the infection intensity differed ( $t_{7.5} =$   
188  $-2.50$ ,  $P = 0.039$ ), with the maternal line reaching higher numbers of spore clusters (208 spore clusters)  
189 after 30 days of exposure than the paternal line (20 spore clusters). The spore numbers in the F1 lines  
190 were similar to the paternal line (7 spore clusters). Most lines in the F2 panel ( $n = 64$ ) had less than 250  
191 spore clusters and only a few ( $n = 2$ ) reached burdens exceeding 1000 spore clusters (Fig. 1C). A single-  
192 QTL genome scan on square root transformed counts of the number of spore clusters revealed a QTL on  
193 linkage group 6 with a LOD score of 5.14 which explained 18% of the phenotypic variation in parasite  
194 burden in infected hosts (Table 1, Fig. 2D, Table S1). Interestingly, F2 genotypes homozygous for the  
195 paternal genotype (AA) carried much higher spore burdens than genotypes with a maternal allele (AB,  
196 BB, Fig. 2E), while burden in the parental lines showed the opposite pattern (maternal clone carrying  
197 higher burden). A subsequent two-QTL scan did not find any additional significant ( $\alpha < 0.05$ ) or  
198 suggestive ( $\alpha < 0.1$ ) QTL. The QTL found for infectivity and burden did not overlap and the notion that  
199 both types of resistance have an independent genetic basis is reinforced by the absence of a correlation  
200 between both traits (supplementary Fig. 1  $\rho = 0.138$ ,  $P = 0.155$ ).

201 *Comparison to other studies*

202 Re-analysis of data from QTL studies on *Hamiltosporidium*, which showed potential overlap with the  
203 QTL identified for *Ordospora*, yielded consistent results with the original analysis (Routtu and Ebert  
204 2015; Krebs et al. 2017), with either the same marker identified or a closely linked marker (within 4 cM,  
205 Table S1). This analysis also revealed that long-term population-level persistence (30 weeks) of infection  
206 with *Hamiltosporidium* was mapped to the same marker that we identified to be associated with  
207 infectivity on linkage group 1 for *Ordospora* (Table S1, Fig 2A). Furthermore, the phenotypic effects of  
208 both resistance traits are nearly identical (Fig. 2D and 2G) and the same region was previously identified  
209 to be under selection (Bourgeois et al. 2017). There was also overlap between a QTL for long-term  
210 persistence of *Hamiltosporidium* and the QTL for within-host burden of *Ordospora* on linkage group 6.  
211 In addition, the QTL identified by Routtu and Ebert (2015) for spore burden following vertical and  
212 horizontal transmission of *Hamiltosporidium* also mapped to the same region (95% confidence intervals  
213 of all studies overlapped, Fig. 2B). Interestingly, however, phenotypic effects for *Ordospora* and  
214 *Hamiltosporidium* are opposite (e.g. individuals homozygous for the maternal phenotype are susceptible  
215 to *Hamiltosporidium* but resistant to *Ordospora*, Fig. 2E and 2H). Routtu and Ebert (2015) also identified  
216 two QTL on linkage group 8 but confidence intervals did not overlap with the QTL we identified on this  
217 linkage group for infectivity of *Ordospora*. We did, however, find that the marker associated with one of

218 the QTL for *Hamiltosporidium* on linkage group 8 is in proximity (70kb) to another area identified to be  
219 under selection (Bourgeois et al. 2017)

## 220 **Discussion**

221 Here we identified four QTLs, which together explained a considerable proportion of the variation in host  
222 resistance against a microsporidium parasite. Our results provide insight into the genetic architecture of  
223 resistance of *Daphnia magna* against *Ordospora colligata*, which underlies local adaptation and the high  
224 levels of variation for resistance in this host-parasite system (Refardt and Ebert 2007, Stanic et al.  
225 unpublished). Furthermore, the identified QTL operate at different stages of the infection process,  
226 highlighting that *Daphnia* has at least two lines of defence against *Ordospora*. Three of the QTL  
227 influence how resistant *Daphnia* are to becoming infected (infectivity) while the fourth QTL affects the  
228 spore load (burden) of animals that have become infected. A comparison with previously published work  
229 (Routtu and Ebert 2015; Bourgeois et al. 2017; Krebs et al. 2017) also revealed that two of the here  
230 identified QTL overlap with QTL for resistance against another microsporidian parasite. Finally, this  
231 comparison also highlighted the pivotal role parasites may play in shaping the host genome as a QTL for  
232 infectivity corresponded to an area previously found to be under selection (Bourgeois et al. 2017).

233 We observed substantial variation in the F2 panel (186 clonal lines generated by selfing a F1  
234 hybrid) for infectivity, the first line of host defence against *Ordospora*. Our analysis detected one QTL at  
235 the beginning of linkage group 1 (Q1) and suggested the presence of a pair of interacting QTL on linkage  
236 groups 7 (Q7) and 8 (Q8), which together explained 33% of the observed variation (Fig.1B, Table 1).  
237 This is comparable to previous studies, which used the same F2 panel to identify QTL involved in  
238 resistance against *Hamiltosporidium tvaerminnensis*, another microsporidian parasite of *Daphnia*. These  
239 studies were able to explain 22% and 38% of the observed variation in infection and long term persistence  
240 in this related system (J Routtu and Ebert 2015; Krebs, Routtu,s and Ebert 2017). Interestingly, one of the  
241 three QTL for long term *Hamiltosporidium* persistence in mesocosm populations identified by Krebs,  
242 Routtu and Ebert (2017) was mapped to the same genetic marker on linkage group one as Q1 (Fig 2A,  
243 Table S1). This indicates that this QTL may offer simultaneous resistance against both parasites, and  
244 potentially microsporidia in general. The fact that this QTL appears to have near identical genotypic  
245 effects and dominance in both studies further supports this notion (compare figure 2D and 2G). Both  
246 Krebs, Routtu and Ebert (2017) and Routtu and Ebert (2015) identified a QTL on linkage group 6 which  
247 influenced spore burden and parasite persistence of *Hamiltosporidium*. Our analysis of the genetics  
248 underlying the second line of defence against *Ordospora*, which influences the amount of spore clusters  
249 which grow within the host, also found a QTL on linkage group 6 (figure 1D, Table 1). This QTL



250 explained 18% of the phenotypic variation in spore burden with confidence intervals overlapping with  
251 those of the previous studies on *Hamiltosporidium* (Fig. 2B). Thus, in addition, to the shared QTL for  
252 infectivity on linkage group one, both microsporidia may also share a QTL that influences the spore  
253 burden within the host. Notably, however, the effect of the QTL on the spore burden of *Hamiltosporidium*  
254 and *Ordospora* is in opposite directions. While the QTL identified for *Hamiltosporidium* makes *Daphnia*  
255 individuals that are homozygous for maternal alleles (BB) more susceptible, the QTL identified here for  
256 *Ordospora* finds that individuals carrying maternal alleles are more resistant to *Ordospora* (compare Fig.  
257 2E and 2H). This may suggest that either we identified a QTL on a separate locus within the same  
258 genomic region as the QTL for *Hamiltosporidium*, or that the same locus has opposites effects on these  
259 two parasites. Both Routtu and Ebert (2015) and our study also identified QTL on linkage group 8;  
260 however, the absence of segregation distortion in our study which was observed for *Hamiltosporidium*  
261 and the non-overlapping confidence intervals leads us to believe that these are separate loci (Fig 2C).

262 We identified separate QTL for infectivity and burden, indicating that both traits act independently to  
263 determine *Daphnia* resistance to *Ordospora*. This is further supported by the absence of a correlation  
264 between both traits (Fig. S1). It is somewhat surprising that infectivity and spore burden are not  
265 correlated to each other, as in our experiment spores released from infected cells are able to re-infect the  
266 same individual directly (cell to cell), and one may therefore expect animals with higher resistance to  
267 infection to have lower spore loads. One possible explanation is that resistance to infectivity only occurs  
268 when the parasite initially invades the gut, and that subsequent within-host spread follows a different  
269 mechanism. A potential mechanism could be if *Ordospora* produces separate spores for within- and  
270 between-host transmission, as has been suggested for other microsporidia (Dunn, Terry and Smith, 2001;  
271 Vizoso and Ebert, 2004; but see Ben-Ami and Urca, 2018 who finds no evidence for separate functions  
272 for different spore types in another microsporidian parasite of *Daphnia*). Independence of different stages  
273 in the host defensive cascade have also been demonstrated in other systems (e.g. plants and soil  
274 pathogens, Yao and Allen 2006; brood parasites and their avian host, Feeney et al. 2014). Together, these  
275 studies support models (Fenton et al. 2012) and calls for subdividing the different stages of the infection  
276 process to obtain a more a comprehensive understanding of the epidemiology and evolutionary potential  
277 of pathogens (see Hall et al. 2017, for a review of the stepwise infection process). Although we only  
278 identified QTL underlying two steps in the host's process of defending against infection, it is likely that  
279 other defensive lines play a role in resisting *Ordospora*. For example, our experimental design did not  
280 allow for host migration behaviour, which has been shown to influence parasite resistance (Decaestecker  
281 et al. 2002) and has a strong genetic basis (De Meester 1993).

282 In addition to host QTL potentially affecting different steps of the infection process, there may be  
283 additional loci or alleles which act in the defensive steps we identified here. Although the parental  
284 genotypes of our study were picked to be as different as possible, the genetic variation captured by the F2  
285 panel represents a subset of the natural variation. Indeed, an explanation for the mismatch between the  
286 highly susceptible F2 lines which were homozygous for the paternal genotype that was highly resistant, is  
287 that the paternal line was heterozygous for a trait(s) not segregating in the F2 panel (i.e. the F2 panel was  
288 based on a single F1 clone which only received half of the genetic material of the paternal line). Results  
289 from a pilot experiment also suggest that the genetic architecture of resistance may be more complex,  
290 with either more alleles on the loci identified here or additional QTL. This pilot found that three of the  
291 seven parasite strains were unable to infect either parent in the QTL panel (Table S2), even though  
292 *Daphnia* susceptible to these strains do exist in nature (Refardt and Ebert 2007, Stanic et al. unpublished).  
293 Future work testing additional *Ordospora* strains on the QTL panel or using GWAS approaches could  
294 help further elucidate the genetic architecture underlying resistance to infection and within-host growth.

295 Although we lack a detailed understanding of the genetic architecture underlying microsporidia resistance  
296 in animals, our finding that resistance to *Ordospora* is coded for by multiple QTL and an epistatic  
297 interaction corroborates previous studies. Indeed, as discussed, resistance against the microsporidian  
298 *Hamiltosporidium* may even be coded for by the same QTL (Rouutu and Ebert 2015; Krebs et al. 2017).  
299 Two other studies on the genetic architecture of microsporidia resistance also conclude that multiple QTL  
300 underlie resistance, with four QTL identified for resistance in both *C. elegans* and honeybee (*Apis*  
301 *mellifera*) hosts (Huang et al. 2014; Balla et al. 2015). The genetic architecture of microsporidian  
302 resistance, with on average  $4.2 \pm 0.4$  QTL and frequent epistasis (80% of cases), is also congruent with  
303 the observation that pathogen resistance in other animals is on average coded for by  $2.47 \pm 1.18$  with  
304 epistasis detected in 77.4% of studies (see Wilfert and Schmid-Hempel 2008 and references therein).  
305 Thus, in general, microsporidian resistance seems to follow the genetic architecture observed for other  
306 parasites, but more work is needed to confirm this.

307 For coevolution to maintain genetic variation via NFDS hosts must show specific resistance to certain  
308 parasite strains and parasites must be able to infect specific hosts (Carius et al. 2001). Furthermore, the  
309 genetic architecture underlying this specificity needs to be based on few loci (less than five loci; Otto and  
310 Nuismer, 2004). Although genotype-genotype interactions have been identified in many host-parasite  
311 systems (e.g. snail and trematode, Lively and Dybdahl 2000; mosquito and dengue, Lambrechts 2010;  
312 *Daphnia* and *Pasteuria*, Lujckx et al. 2011; bumble bee and *Crithidia bombi*, Barribeau et al. 2014),  
313 information on the genetic architecture underlying genotype – genotype interactions is available for few  
314 systems (e.g. Wilfert et al. 2007; Bento et al. 2017). Here, we showed that the genetic architecture of host

315 resistance to *Ordospora* is relatively simple (less than 5 QTL), consistent with the requirements for  
316 coevolution by negative frequency-dependent selection. However, as not only the number of QTL but  
317 also the interaction (i.e. epistasis) among QTL conferring resistance to different *Ordospora* strains would  
318 be critical for the outcome of the evolutionary dynamics, we cannot draw concrete conclusions on the  
319 occurrence of NFDS. The absence of parasites able to infect all host types and presence of highly  
320 specialised parasite strains (Refardt and Ebert 2007, Stanic et al. unpublished) does suggest that QTL  
321 conferring resistance to other *Ordospora* strains may not be independent, or that these QTL carry fitness  
322 costs. One potential cost of resistant to *Ordospora* could be susceptibility to *Hamiltosporidium* (i.e.  
323 antagonistic pleiotropy), as we find that the same genomic region affects the burden of both microsporidia  
324 in opposite directions (both parasites frequently co-occur throughout part of their range (Ebert 2005)).  
325 Previous work in another *Daphnia*-pathogen system also identified a genomic region with opposing  
326 effects on parasite resistance, depending on the pathogen's identity. *Daphnia* were either resistant to one  
327 strain of the bacterial pathogen *Pasteuria ramosa* or to a different strain, but not resistant to both strains  
328 (Luijckx et al. 2013). Modeling work has shown that such a genetic architecture of resistance could  
329 support the maintenance of genetic variation at the resistance locus (Luijckx et al. 2013; Engelstädter  
330 2015). Although the locus underlying *Pasteuria* resistance was mapped to linkage group 3 (Bento et al.  
331 2017) and thus does not overlap with the QTL found here, similar dynamics may occur between  
332 *Ordospora* and *Hamiltosporidium* if resistance to both microspodia is coded by the same locus.

333           Regardless of the type of selection (selective sweeps, NFDS or a combination of both), the  
334 finding that QTL1 coincided with an area of the genome that was previously found to be under positive  
335 selection (Bourgeois et al. 2017) suggests that microsporidia can exert substantial selection pressure on  
336 their *Daphnia* host (Fig2A). This is consistent with previous studies on *Ordospora*, which discovered  
337 local adaption in natural populations (Refardt and Ebert 2007)(Stanic et al. unpublished), observed  
338 changes in genotype frequencies of the host during experimental epidemics (Capual and Ebert 2003), and  
339 high prevalence in natural populations (up to 100%, Ebert 2005). Although no genes of known function  
340 were located within the direct vicinity of the region under selection, the closest known gene is a  
341 Lactosylceramide (Bourgeois et al. 2017) which has been shown to be involved in innate immune  
342 processes and is known to bind to different types of pathogens (Zimmerman et al. 1998; Hahn et al.  
343 2003). A comparison of the different genomic studies of *Daphnia* also revealed that an area under  
344 selection on linkage group 8 was in proximity (less than 70 kb) to a QTL previously identified to be  
345 involved in regulating resistance to *Hamiltosporidium*. This region was also previously associated with  
346 the induction of diapause, which is linked to sexual reproduction in *D. magna* (Roulin et al. 2016) and  
347 associated with a rhodopsin gene (a photoreceptor) (Bourgeois et al. 2017). In natural populations,

348 induction of diapause may increase resistance to parasites either directly (*Hamiltosporidium* prevalence in  
349 resting stages is known to be lower; Vizoso, Lass and Ebert, 2005) or indirectly due to the creation of  
350 genetically more diverse offspring by meiosis. Intriguingly, Red Queen models which explore the  
351 evolution of sex due to selection by parasites often assume a closely linked pathogen resistance loci and a  
352 locus that can modify sexual reproduction (Agrawal 2009). With two regions associated with resistance to  
353 microsporidia and an additional two regions previously identified to be under selection by the bacterial  
354 pathogen *Pasteuria* (Bourgeois et al. 2017), parasites seem to play a major role in shaping the genome of  
355 *Daphnia*. Indeed, out of the six regions under selection that were identified so far, four co-localize with  
356 loci involved in parasite resistance.

357 Pathogens are ubiquitous, and evidence that they play a key role in many ecological and evolutionary  
358 processes has been accumulating over the last century (e.g. maintenance of genetic variation, Haldane  
359 1949; mate choice, Hamilton and Zuk 1982). Indeed, in addition to our findings, pathogens have also  
360 been identified as a major force of selection in humans with over 100 genes identified to be under  
361 selection by a pathogens (Fumagalli et al. 2011), have shown to play a major role in selection of MHC  
362 genes (Eizaguirre et al. 2012; Kamiya et al. 2014), and may be responsible for maintaining a disease-  
363 resistance polymorphism on the *Rpm1* locus of *Arabidopsis thaliana* over millions of years (Stahl et al.  
364 1999). The number of studies that identify genes under selection and link phenotype to genotype is  
365 increasing. Further investigation into the role of genetic architecture of host resistance will be key to  
366 understanding local adaption in natural populations, the maintenance of genetic variation, disease  
367 dynamics and coevolution.

### 368 **Acknowledgements**

369 We are grateful to Dieter Ebert and Jürgen Hottinger for providing the *Daphnia* F2 panel, data from  
370 previously published work and R-codes for analysis and to Meret J. Halter, Peter Fields and Jarkko  
371 Routto for assistance with analysis. We also thank Martin Krkosek for the use of his laboratory and  
372 facilities and are grateful to the many undergraduates of University of Toronto that assisted us with this  
373 project.

### 374 **Literature list**

- 375 Agrawal, A. F. 2009. Differences between selection on sex versus recombination in Red Queen models  
376 with diploid hosts. *Evolution* 63:2131–2141.
- 377 Balla, K. M., E. C. Andersen, L. Kruglyak, and E. R. Troemel. 2015. A wild *C. elegans* strain has  
378 enhanced epithelial immunity to a natural microsporidian parasite. *PLOS Pathog.* 11:e1004583.

- 379 Barribeau, S. M., B. M. Sadd, L. du Plessis, and P. Schmid-Hempel. 2014. Gene expression differences  
380 underlying genotype-by-genotype specificity in a host-parasite system. *Proc. Natl. Acad. Sci. U. S.*  
381 *A.* 111:3496–501.
- 382 Ben-Ami, F., and H. Urca. 2018. The role of spore morphology in horizontal transmission of a  
383 microsporidium of *Daphnia*. *Parasitology* 145:1452-1457
- 384 Bento, G., J. Routtu, P. D. Fields, Y. Bourgeois, L. Du Pasquier, and D. Ebert. 2017. The genetic basis of  
385 resistance and matching-allele interactions of a host-parasite system: The *Daphnia magna-Pasteuria*  
386 *ramosa* model. *PLOS Genet.* 13:e1006596.
- 387 Betts, A., C. Gray, M. Zelek, R. C. MacLean, and K. C. King. 2018. High parasite diversity accelerates  
388 host adaptation and diversification. *Science* 360:907–911.
- 389 Bonneaud, C., S. L. Balenger, A. F. Russell, J. Zhang, G. E. Hill, and S. V Edwards. 2011. Rapid  
390 evolution of disease resistance is accompanied by functional changes in gene expression in a wild  
391 bird. *Proc. Natl. Acad. Sci. U. S. A.* 108:7866–7871.
- 392 Bourgeois, Y., A. C. Roulin, K. Müller, and D. Ebert. 2017. Parasitism drives host genome evolution:  
393 Insights from the *Pasteuria ramosa Daphnia magna* system. *Evolution* 71:1106–1113.
- 394 Broman, K. W., H. Wu, S. Sen, and G. A. Churchill. 2003. R/qtl: QTL mapping in experimental crosses.  
395 *Bioinformatics* 19:889–890.
- 396 Capual, M., and D. Ebert. 2003. Parasite-mediated selection in experimental *daphnia magna* populations.  
397 *Evolution* 57:249–260.
- 398 Carius, H. J., T. J. Little, and D. Ebert. 2001. Genetic variation in a host-parasite association: potential for  
399 coevolution and frequency-dependent selection. *Evolution* 55:1136–1145.
- 400 De Meester, L. 1993. Genotype, fish-mediated chemical, and phototactic behavior in *Daphnia magna*.  
401 *Ecology* 74:1467–1474.
- 402 Decaestecker, E., L. De Meester, and D. Ebert. 2002. In deep trouble: habitat selection constrained by  
403 multiple enemies in zooplankton. *Proc. Natl. Acad. Sci. U. S. A.* 99:5481–5485.
- 404 Dunn, A. M., R. S. Terry, and J. E. Smith. 2001. Transovarial transmission in the microsporidia. *Adv.*  
405 *Parasitol.* 48:57–100.

- 406 Dybdahl, M. F., and C. M. Lively. 1998. Host-parasite coevolution: evidence for rare advantage and time-  
407 lagged selection in a natural population. *Evolution* 52:1057-1066.
- 408 Ebert, D. 2005. Ecology; epidemiology; and evolution of parasitism in *Daphnia* [Internet]. National  
409 Library of Medicine (US); National Center for Biotechnology Information., Bethesda (MD).
- 410 Ebert, D. 2018. Open questions: what are the genes underlying antagonistic coevolution? *BMC Biol.*  
411 16:114.
- 412 Eizaguirre, C., T. L. Lenz, M. Kalbe, and M. Milinski. 2012. Divergent selection on locally adapted major  
413 histocompatibility complex immune genes experimentally proven in the field. *Ecol. Lett.* 15:723–  
414 731.
- 415 Engelstädter, J. 2015. Host-parasite coevolutionary dynamics with generalized success/failure infection  
416 genetics. *Am. Nat.* 185:E117-129.
- 417 Feeney, W. E., J. A. Welbergen, and N. E. Langmore. 2014. Advances in the study of coevolution  
418 between avian brood parasites and their hosts. *Annu. Rev. Ecol. Evol. Syst* 45:227–246.
- 419 Feenstra, B., I. M. Skovgaard, and K. W. Broman. 2006. Mapping quantitative trait loci by an extension  
420 of the Haley-Knott regression method using estimating equations. *Genetics* 173:2269–2282.
- 421 Fenton, A., J. Antonovics, and M. a. Brockhurst. 2012. Two-step infection processes can lead to  
422 coevolution between functionally independent infection and resistance pathways. *Evolution*  
423 66:2030–2041.
- 424 Fumagalli, M., M. Sironi, U. Pozzoli, A. Ferrer-Admettla, L. Pattini, and R. Nielsen. 2011. Signatures of  
425 environmental genetic adaptation pinpoint pathogens as the main selective pressure through human  
426 evolution. *PLoS Genet* 7: e1002355.
- 427 Haag, K. L., J. I. R. Larson, D. Refardt, and D. Ebert. 2011. Cytological and molecular description of  
428 *Hamiltosporidium tvaerminnensis* gen. et sp. nov., a microsporidian parasite of *Daphnia magna*, and  
429 establishment of *Hamiltosporidium magnivora* comb. nov. *Parasitology* 138:447–462.
- 430 Hahn, P. Y., S. E. Evans, T. J. Kottom, J. E. Standing, R. E. Pagano, and A. H. Limper. 2003.  
431 *Pneumocystis carinii* cell wall  $\beta$ -glucan induces release of macrophage inflammatory protein-2 from  
432 alveolar epithelial cells via a lactosylceramide-mediated mechanism. *J. Biol. Chem.* 278:2043–2050.

- 433 Haldane, J. B. S. 1949. Disease and evolution. Suppl. to La Ric. Sci. 19:68–76.
- 434 Hall, M. D., G. Bento, and D. Ebert. 2017. The evolutionary consequences of stepwise infection  
435 processes. Trends Ecol. Evol. 32:612–623.
- 436 Hamilton, W. D., and M. Zuk. 1982. Heritable true fitness and bright birds: a role for parasites? Science  
437 218:384–387.
- 438 Hammond-Kosack, K. E., and J. D. G. Jones. 1997. Plant disease resistance genes. Annu. Rev. Plant  
439 Physiol. Plant Mol. Biol. 48:575–607.
- 440 Hatcher, M. J., J. T. A. Dick, and A. M. Dunn. 2006. How parasites affect interactions between  
441 competitors and predators. Ecol. Lett. 9:1253–1271.
- 442 Huang, Q., P. Kryger, Y. Le Conte, H. Michael, G. Lattorff, F. B. Kraus, and R. F. A. Moritz. 2014. Four  
443 quantitative trait loci associated with low *Nosema ceranae* (Microsporidia) spore load in the  
444 honeybee *Apis mellifera*. Apidologie 45:248–256.
- 445 Kamiya, T., K. O’Dwyer, H. Westerdahl, A. Senior, and S. Nakagawa. 2014. A quantitative review of  
446 MHC-based mating preference: the role of diversity and dissimilarity. Mol. Ecol. 23:5151–5163.
- 447 King, K. C., and C. M. Lively. 2012. Does genetic diversity limit disease spread in natural host  
448 populations? Heredity 109:199–203.
- 449 Klüttgen, B., U. Dulmer, M. Engels, and H. T. Ratte. 1994. Adam, an artificial fresh-water for the culture  
450 of zooplankton. Water Res. 28:743–746.
- 451 Krebs, M., J. Routtu, and D. Ebert. 2017. QTL mapping of a natural genetic polymorphism for long-term  
452 parasite persistence in *Daphnia* populations. Parasitology 144:1686–1694.
- 453 Lambrechts, L. 2010. Quantitative genetics of *Aedes aegypti* vector competence for dengue viruses:  
454 towards a new paradigm? Trends Parasitol. 27:111–114.
- 455 Lively, C. M., and M. F. Dybdahl. 2000. Parasite adaptation to locally common host genotypes. 679–681.
- 456 Luijckx, P., F. Ben-ami, L. Mouton, L. Du Pasquier, and D. Ebert. 2011. Cloning of the unculturable  
457 parasite *Pasteuria ramosa* and its *Daphnia* host reveals extreme genotype – genotype interactions.  
458 Ecol. Lett. 14:125–131.

- 459 Luijckx, P., H. Fienberg, D. Duneau, and D. Ebert. 2013. A matching-allele model explains host  
460 resistance to parasites. *Curr. Biol.* 23:1085–1088.
- 461 Metzger, M. J. A., P. Luijckx, G. Bento, M. Mariadassou, and D. Ebert. 2016. The Red Queen lives:  
462 Epistasis between linked resistance loci. *Evolution* 70:480–487.
- 463 Otto, S. P., and S. L. Nuismer. 2004. Species interactions and the evolution of sex. *Science* 304:1018–  
464 1020.
- 465 R Development Core Team. 2016. R: A language and environment for statistical computing. R  
466 Foundation for Statistical Computing, Vienna, Austria.
- 467 Refardt, D., and D. Ebert. 2007. Inference of parasite local adaptation using two different fitness  
468 components. *J. Evol. Biol.* 20:921–929.
- 469 Roulin, A. C., Y. Bourgeois, U. Stiefel, J.-C. Walser, and D. Ebert. 2016. A photoreceptor contributes to  
470 the natural variation of diapause induction in *Daphnia magna*. *Mol. Biol. Evol.* 33:3194–3204.
- 471 Routtu, J., and D. Ebert. 2015. Genetic architecture of resistance in *Daphnia* hosts against two species of  
472 host-specific parasites. *Heredity* 114:241–248.
- 473 Routtu, J., M. D. Hall, B. Albere, C. Beisel, R. D. Bergeron, A. Chaturvedi, J. H. Choi, J. Colbourne, L.  
474 De Meester, M. T. Stephens, C. P. Stelzer, E. Solorzano, W. K. Thomas, M. E. Pfrender, and D.  
475 Ebert. 2014. An SNP-based second-generation genetic map of *Daphnia magna* and its application to  
476 QTL analysis of phenotypic traits. *BMC Genomics* 15:1033.
- 477 Routtu, J., B. Jansen, I. Colson, L. De Meester, and D. Ebert. 2010. The first-generation *Daphnia magna*  
478 linkage map. *BMC Genomics* 11:508.
- 479 Springbett, A. J., K. MacKenzie, J. A. Woolliams, and S. C. Bishop. 2003. The contribution of genetic  
480 diversity to the spread of infectious diseases in livestock populations. *Genetics* 165:1465–1474.
- 481 Stahl, E. A., G. Dwyer, R. Mauricio, M. Kreitman, and J. Bergelson. 1999. Dynamics of disease  
482 resistance polymorphism at the *Rpm1* locus of *Arabidopsis*. 400:667-671.
- 483 Strauss, A., A. White, and M. Boots. 2012. Invading with biological weapons: the importance of disease-  
484 mediated invasions. *Funct. Ecol.* 26:1249–1261.



- 485 Thompson, J. N., and J. J. Burdon. 1992. Gene-For-Gene coevolution between plants and parasites.  
486 Nature 360:121-125.
- 487 Vizoso, D. B., and D. Ebert. 2004. Within-host dynamics of a microsporidium with horizontal and  
488 vertical transmission: *Octospora bayeri* in *Daphnia magna*. Parasitology 128:31-38.
- 489 Vizoso, D. B., S. Lass, and D. Ebert. 2005. Different mechanisms of transmission of the microsporidium  
490 *Octospora bayeri*: a cocktail of solutions for the problem of parasite permanence. Parasitology  
491 130:501–509.
- 492 Wilfert, L., J. Gadau, B. Baer, and P. Schmid-Hempel. 2007. Natural variation in the genetic architecture  
493 of a host-parasite interaction in the bumblebee *Bombus terrestris*. Mol. Ecol. 16:1327–1339.
- 494 Wilfert, L., and P. Schmid-Hempel. 2008. The genetic architecture of susceptibility to parasites. BMC  
495 Evol. Biol. 8:187.
- 496 Yao, J., and C. Allen. 2006. Chemotaxis is required for virulence and competitive fitness of the bacterial  
497 wilt pathogen *Ralstonia solanacearum*. J. Bacteriol. 188:3697–3708.
- 498 Zhang, R., F. Zheng, S. Wei, S. Zhang, G. Li, P. Cao, and S. Zhao. 2019. Evolution of disease defense  
499 genes and their regulators in plants. Int. J. Mol. Sci. 20:335.
- 500 Zimmerman, J. W., J. Lindermuth, P. A. Fish, G. P. Palace, T. T. Stevenson, and D. E. DeMong. 1998. A  
501 novel carbohydrate-glycosphingolipid interaction between a beta-(1-3)-glucan immunomodulator,  
502 PGG-glucan, and lactosylceramide of human leukocytes. J. Biol. Chem. 273:22014–20.
- 503

504 **Tables**

505 **Table 1:** phenotypic variation explained by the QTL detected for infectivity and spore burden. The full  
506 QTL model for infectivity which combined the QTL detected in single dimensional scans (Q1) and QTL  
507 detected in two dimensional scans (Q7 and Q8) could explain ~32% of the observed variation. For burden  
508 within the host we detected a single QTL (Q6) which explained ~19% of the observed variation. All  
509 models were highly significant ( $P < 0.0001$ ).

| Trait               | model      | df | Mean-square | LOD   | % of variance explained |
|---------------------|------------|----|-------------|-------|-------------------------|
| Infectivity (n=164) | y~Q1       | 2  | 0.899       | 4.90  | 12.86                   |
|                     | y~Q7*Q8    | 8  | 0.396       | 9.15  | 22.66                   |
|                     | y~Q1+Q7*Q8 | 10 | 0.442       | 13.62 | 31.79                   |
| Burden (n=114)      | y~Q6       | 2  | 648.31      | 5.14  | 18.76                   |

510

511

512

513 **Figures**

514

515

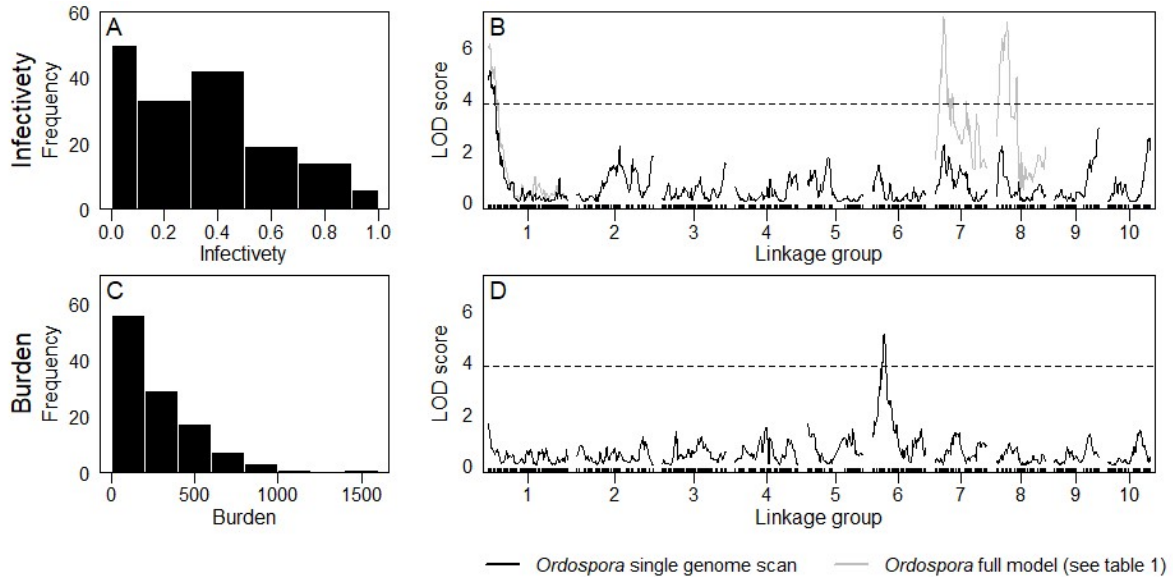

516

517 Figure 1: QTL mapping of resistance and burden of the *Daphnia magna* parasite *Ordospora colligata*.  
518 **Panel A** shows the frequency distribution of the percentage of replicates that became infected with  
519 *Ordospora* for each of the F2 clones. **Panel B** shows the results of the QTL mapping for both the single  
520 genome scan for infectivity (black line) and the full QTL model which includes the suggestive interaction  
521 ( $\alpha = 0.1$ ) between QTL on linkage group 7 and 8. **Panel C** shows the frequency distribution of the  
522 number of spore clusters within the host and **Panel D** the results of the QTL mapping of the single  
523 genome scan for within-host burden. The dotted black line in panels B and D represents the LOD  
524 threshold for significance add  $\alpha = 0.05$ .

525

526

527

528

529

530

531

532

533

534

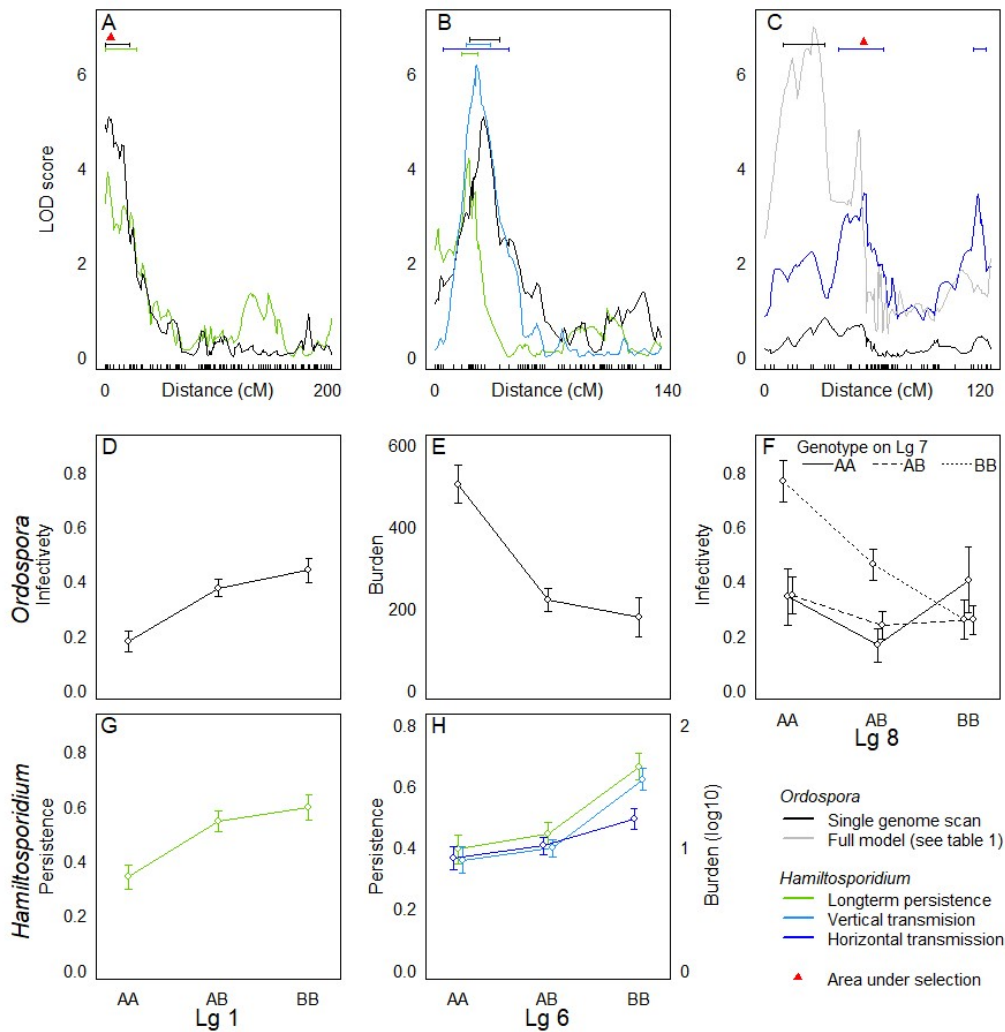

535

536 Figure 2: QTL for infectivity and within-host burden of the *Daphnia magna* parasite *Ordospora colligata*  
 537 in comparison to previously identified resistance QTL for *Hamiltosporidium tvaerminnensis* and areas in  
 538 the *Daphnia* genome under selection. **Panels A to C** show the QTL profiles of the different studies on  
 539 linkage groups 1,6 and 8. Ninety-five percent confidence intervals (depicted by the coloured horizontal  
 540 lines) overlap on linkage group 1 for long-term persistence of *Hamiltosporidium* and *Ordospora*  
 541 infectivity and occur within an area in the genome under selection (red triangle, **panel A**). The phenotypic  
 542 effects for both of these QTL are also identical for *Ordospora* and *Hamiltosporidium* (depicted in **panels**  
 543 **D** and **G**). Confidence intervals also overlap for QTL on linkage group 6 for *Ordospora* and  
 544 *Hamiltosporidium*. QTL for horizontal, vertical transmission, and long-term *Hamiltosporidium*  
 545 persistence coincide with the QTL for within-host burden of *Ordospora* (**panel B**, QTL profile for  
 546 horizontal transmission, which maps to the same marker as vertical transmission, omitted for clarity).  
 547 Phenotypic effects in this case are however opposite with individuals homozygous for the “A” allele  
 548 having a higher *Ordospora* burden (**panel E**) but a lower *Hamiltosporidium* burden (**panel H**).  
 549 Confidence intervals on linkage group 8 for *Ordospora* resistance and within-host burden for  
 550 *Hamiltosporidium* did not overlap and these are likely separate loci (**panel C**). Panel F shows the  
 551 phenotypic effect of the interaction between linkage group 7 and 8 for *Ordospora* resistance.
